# Supplementary material
Source: publisher figshare collection journal article supplement (https://tandf.figshare.com/ndownloader/files/13772198)
Supplement: Supplementary file 1 [file 13772198]

**Online Appendix: List of interviews**

***United Kingdom***

| **Code** | **Affiliation** | **Date** |
| --- | --- | --- |
| UK_1 | University Association | 08.12.2016 |
| UK_2 | University Association | 17.12.2015 |
| UK_3 | Employer Association | 22.04.2015 |
| UK_4 | Employer Association | 17.04.2015 |
| UK_5 | Employer Association | 31.03.2015 |
| UK_6 | Think-tank | 03.12.2015 |
| UK_7 | Government | 17.12.2015 |
| UK_8 | University (pre-1992) | 13.05.2016 |
| UK_9 | University (pre-1992) | 21.03.2016 |
| UK_10 | University (pre-1992) | 22.07.2016 |
| UK_11 | University (pre-1992) | 22.07.2016 |
| UK_12 | University (pre-1992) | 07.03.2016 |
| UK_13 | University (pre-1992) | 15.03.2016 |
| UK_14 | University (pre-1992) | 16.03.2016 |
| UK_15 | University (post-1992) | 22.03.2016 |
| UK_16 | University (post-1992) | 13.05.2016 |
| UK_17 | University (post-1992) | 26.04.2016 |
| UK_18 | University (post-1992) | 26.04.2016 |
| UK_19 | University (post-1992) | 26.02.2016 |
| UK_20 | University (post-1992) | 26.02.2016 |

***Germany***

| **Code** | **Affiliation** | **Date** |
| --- | --- | --- |
| DE_1 | University Association | 05.04.2016 |
| DE_2 | University Association | 11.08.2016 |
| DE_3 | Employer Association | 05.04.2016 |
| DE_4 | Employer Association | 17.06.2016 |
| DE_5 | Employer Association | 27.10.2016 |
| DE_6 | Government | 10.05.2016 |
| DE_7 | Government | 26.05.2016 |
| DE_8 | Think-tank | 22.04.2016 |
| DE_9 | University of Applied Sciences | 27.04.2016 |
| DE_10 | University of Applied Sciences | 27.04.2016 |
| DE_11 | University of Applied Sciences | 04.05.2016 |
| DE_12 | University of Applied Sciences | 02.05.2016 |
| DE_13 | University of Applied Sciences | 31.05.2016 |
| DE_14 | University of Applied Sciences | 19.04.2016 |
| DE_15 | University | 15.04.2016 |
| DE_16 | University | 22.04.2016 |
| DE_17 | University | 30.05.2016 |
| DE_18 | University | 19.05.2016 |
| DE_19 | University | 19.05.2016 |
| DE_20 | University | 08.06.2016 |

***South Korea***

| **Code** | **Affiliation** | **Date** |
| --- | --- | --- |
| KR_1 | Government | 09.09.2016 |
| KR_2 | University Association | 21.09.2016 |
| KR_3 | Think-tank | 20.09.2016 |
| KR_4 | Think-tank | 20.09.2016 |
| KR_5 | University (private) | 20.09.2016 |
| KR_6 | University (private) | 20.09.2016 |
| KR_7 | University (public) | 07.09.2016 |
| KR_8 | University (public) | 07.09.2016 |
| KR_9 | University (public) | 13.09.2016 |
| KR_10 | University (public) | 13.09.2016 |
| KR_11 | University (private) | 13.09.2016 |
| KR_12 | University (private) | 13.09.2016 |
| KR_13 | University (private); gov’t advisor | 20.09.2016 |
| KR_14 | University (public) | 08.09.2016 |
| KR_15 | University (public) | 08.09.2016 |
